# Supplementary material for: Intratracheal Transplantation of Mesenchymal Stem Cells Attenuates Hyperoxia-Induced Microbial Dysbiosis in the Lungs, Brain, and Gut in Newborn Rats
Source: MDPI journal article supplement (doi:10.3390/ijms23126601), 2022-06-13
Supplement: s1 [file s1]

## Large Intestine oxidative stress

### Oxidative stress

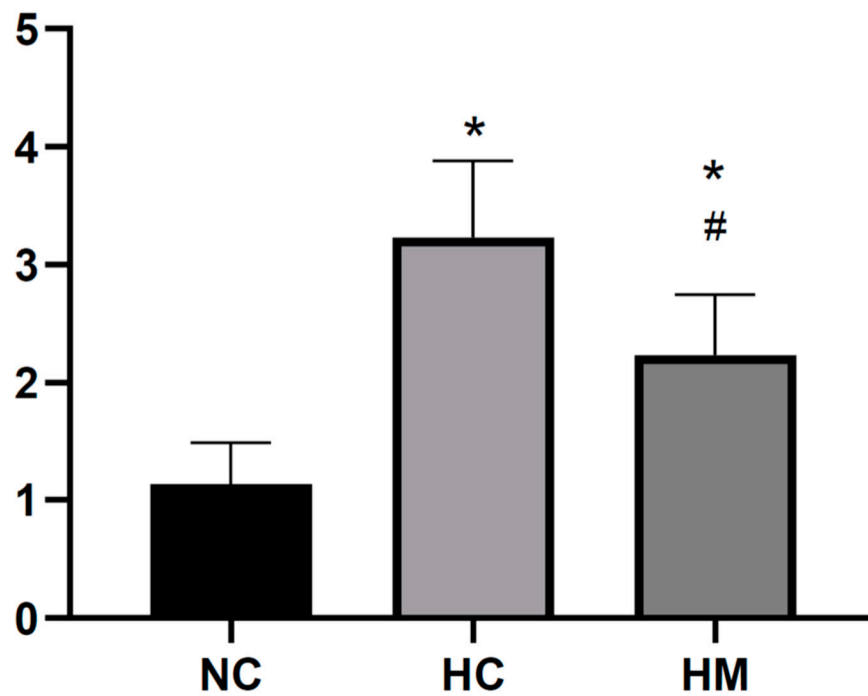

**Figure S1. Large intestine oxidative stress.**

Oxidative stress was assessed with levels of Malondialdehyde in the large intestine in each group. Data are presented as the mean  $\pm$  standard deviation. Abbreviations: NC, normoxia control; HC, hyperoxia control; HM, hyperoxia with transplantation of human UCB-MSCs.

\*,  $P < 0.05$  compared with the NC group; #,  $P < 0.05$  compared with the HC group.
